# Supplementary material
Source: publisher site journal article supplement (https://static.cambridge.org/content/id/urn:cambridge.org:id:article:S1047951121001414/resource/name/S1047951121001414supp002.docx)
Supplement: Supplementary file 1 [file S1047951121001414supp002.docx]

**Supplementary ~~Material~~ Table ~~3~~ 2.** Educational attainment for stratified groups.

|  | ***MAP<40 mmHg***  ***n=33*** | ***MAP>40 mmHg***  ***n=25*** | ***p-value*** |
| --- | --- | --- | --- |
| **Educational attainment** |  |  |  |
| ISCED Primary education, n (%) | 2 (6) | 0 (0) | 0.347 |
| ISCED Secondary education, n (%) | 26 (79) | 19 (76) |
| ISCED Tertiary education, n (%) | 5 (15) | 6 (24) |
| Dyslexia, n (%) | 5 (15) | 5 (20) | 0.628 |
| Dyscalculia, n (%) | 1 (3) | 2 (8) | 0.413 |
| Special needs teachinga, n (%) | 13 (39) | 13 (52) | 0.339 |
| Educational Psychologist Counsellingb, n (%) | 5 (15) | 4 (16) | 0.930 |

Data reported as absolute numbers and percentages of patients.

aReceived special needs teaching during primary - or secondary school.

bReceived educational psychologist counselling during primary or secondary school.

ISCED, International Standard Classification of Education 2011; MAP, mean arterial pressure.
